# Supplementary material for: Cationic Azobenzenes as Light-Responsive Crosslinkers for Alginate-Based Supramolecular Hydrogels
Source: MDPI journal article supplement (doi:10.3390/polym16091233), 2024-04-28
Supplement: s1 [file s1]

# Cationic Azobenzenes as Light-Responsive Crosslinkers for Alginate-Based Supramolecular Hydrogels

Miriam Di Martino <sup>1</sup>, Lucia Sessa <sup>1,2,\*</sup>, Barbara Panunzi <sup>3</sup>, Rosita Diana <sup>3</sup>, Stefano Piotto <sup>1,2</sup> and Simona Concilio <sup>1,2,\*</sup>

<sup>1</sup> Department of Pharmacy, University of Salerno, Via Giovanni Paolo II, 132, 84084 Fisciano, Italy; midimartino@unisa.it (M.D.M.); piotto@unisa.it (S.P.)

<sup>2</sup> BIONAM Research Center for Biomaterials, University of Salerno, 84084 Fisciano, Italy

<sup>3</sup> Department of Agriculture, University of Napoli Federico II, Via Università 100, 80055 Portici, Italy; barbara.panunzi@unina.it (B.P.); rosita.diana@unina.it (R.D.)

\* Correspondence: lucessa@unisa.it (L.S.); sconcio@unisa.it (S.C.)

## Supplementary Materials

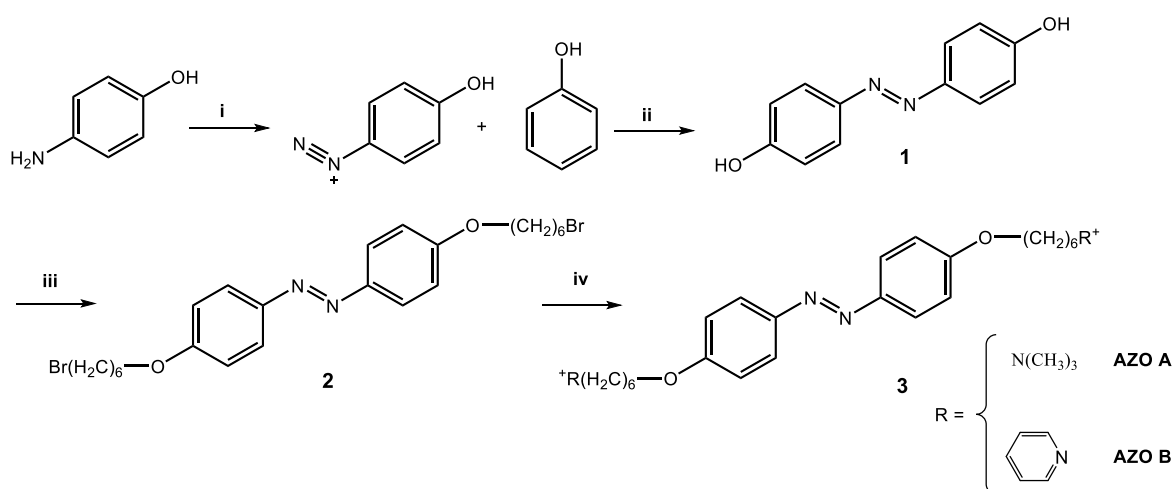

**Figure S1.** Synthetic scheme of AZO A and AZO B.

i)  $\text{NaNO}_2$ ,  $\text{H}_2\text{O}/\text{HCl}$ ,  $0-5^\circ\text{C}$ , 30 min; ii)  $\text{NaOH}$  pH=11,  $10-15^\circ\text{C}$ , 3h; iii) 1,6- dibromohexane,  $\text{K}_2\text{CO}_3$ ,  $\text{CH}_3\text{CN}$  dry, reflux, 48h; iv)  $\text{N}(\text{CH}_3)_3$  in ethanol solution,  $50^\circ\text{C}$ , 48h for AZO A and Py in acetonitrile,  $70^\circ\text{C}$ , 48h for AZO B.

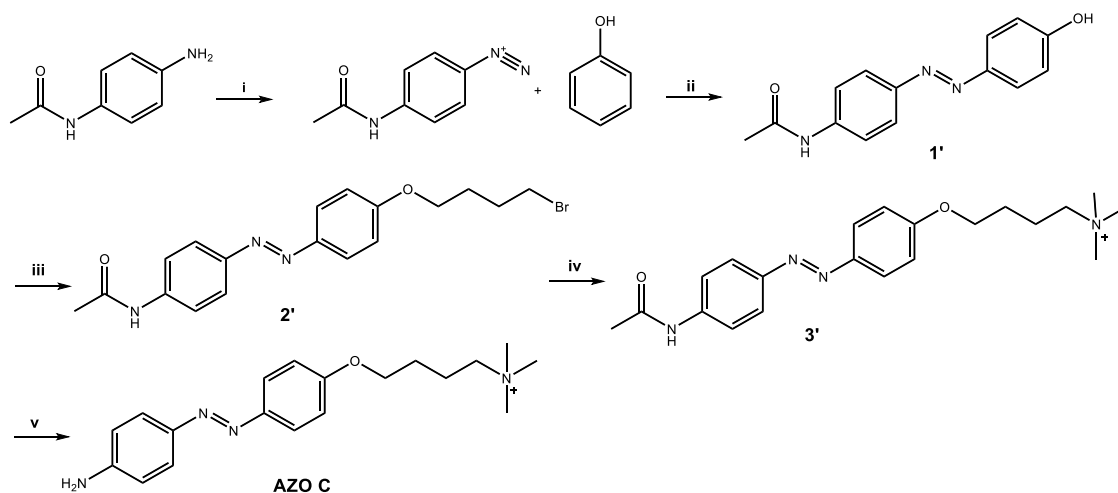

**Figure S2.** Synthetic scheme of AZO C.

i)  $\text{NaNO}_2$ ,  $\text{H}_2\text{O}/\text{HCl}$ ,  $0-5^\circ\text{C}$ , 30 min; ii)  $\text{NaOH}$  pH=11,  $10-15^\circ\text{C}$ , 3h; iii) 1,4-dibromobutane,  $\text{K}_2\text{CO}_3$ , KI, acetone, reflux, 4h; iv)  $\text{N}(\text{CH}_3)_3$  in ethanol solution,  $50^\circ\text{C}$ , 48h; v)  $\text{HCl}$  conc,  $40^\circ\text{C}$ , overnight.

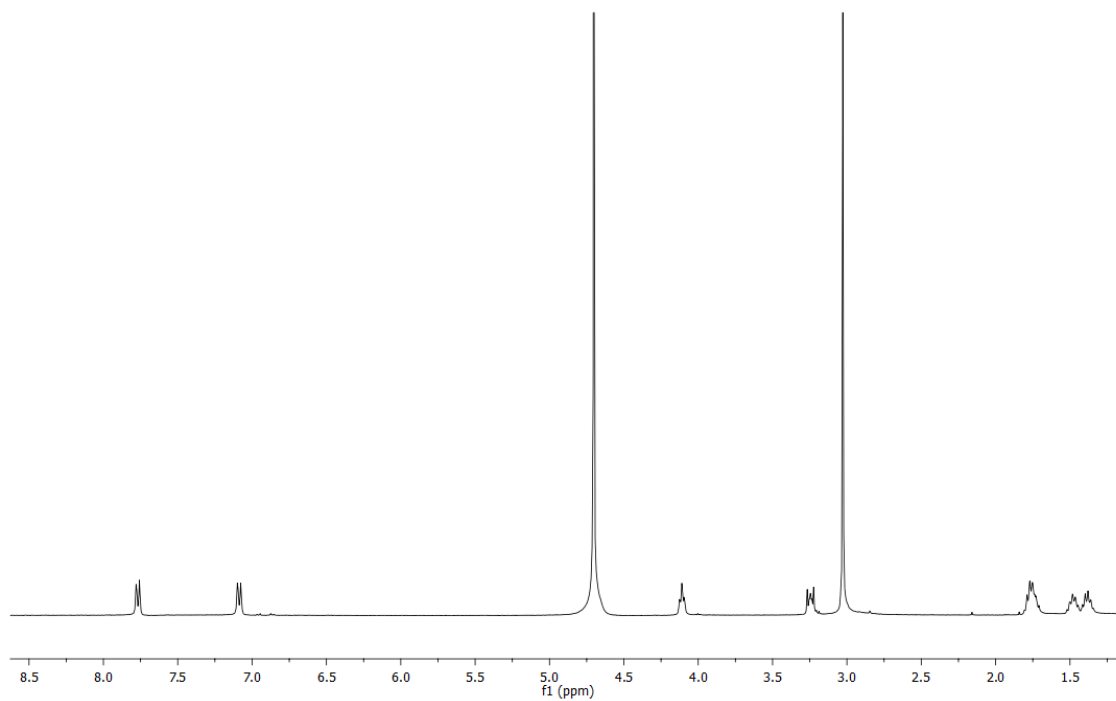

**Figure S3.**  $^1\text{H}$  NMR of AZO A ( $\text{D}_2\text{O}$ ; 400 MHz)

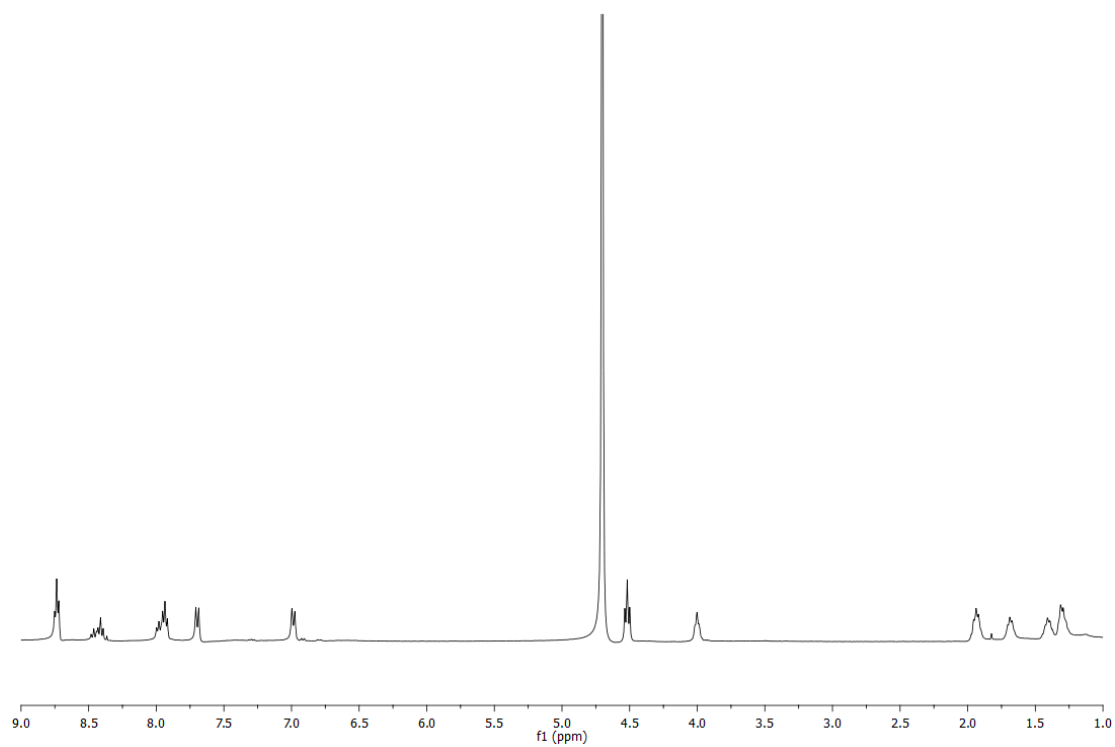

**Figure S4.**  $^1\text{H}$  NMR of AZO B ( $\text{D}_2\text{O}$ ; 400 MHz)

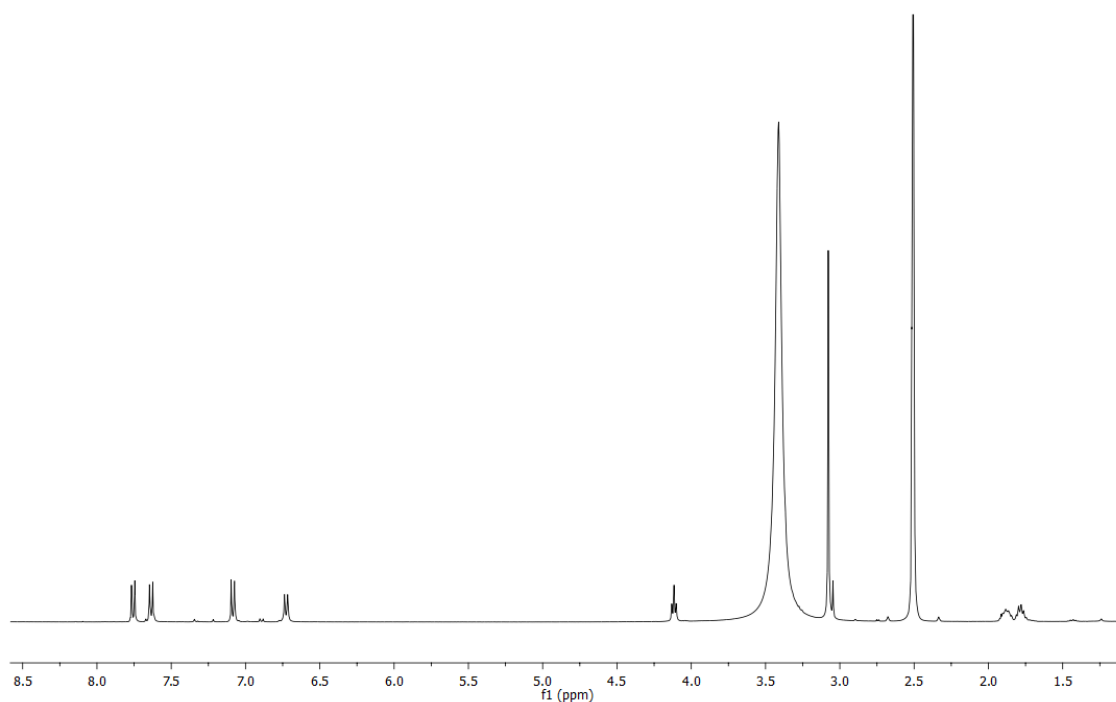

**Figure S5.**  $^1\text{H}$  NMR of AZO C (DMSO- $\text{d}_6$ ; 400 MHz)

**Table S1.** Scheme of molecular behavior of the hydrogels under the action of pHs and lights

|                 | Composition<br>(wt%) | Hydrogel<br>pH 7 | Hydrogel<br>pH 4 | Gel-sol<br>(365nm irradiation) | Sol-gel<br>(day light) |
|-----------------|----------------------|------------------|------------------|--------------------------------|------------------------|
| <b>SA_AZO A</b> | 8/0.5                | ✗                | ✓                | ✓                              | ✓                      |
|                 | 8/1                  | ✗                | ✓                | ✓                              | ✓                      |
|                 | 5/0.5                | ✗                | ✗                |                                |                        |
|                 | 5/1                  | ✗                | ✓                | ✓                              | ✓                      |
|                 | 2/0.5                | ✗                |                  |                                |                        |
|                 | 2/1                  | ✗                |                  |                                |                        |
| <b>SA_AZO B</b> | 8/0.5                | ✗                |                  |                                |                        |
|                 | 8/1                  | ✗                |                  |                                |                        |
|                 | 5/0.5                | ✗                | ✓                | ✓                              | ✓                      |
|                 | 5/1                  | ✗                | ✓                | ✓                              | ✓                      |
|                 | 2/0.5                | ✗                | ✗                |                                |                        |
|                 | 2/1                  | ✗                | ✗                |                                |                        |
| <b>SA_AZO C</b> | 8/0.5                | ✗                |                  |                                |                        |
|                 | 8/1                  | ✗                |                  |                                |                        |
|                 | 5/0.5                | ✗                | ✓                | ✓                              | ✓                      |
|                 | 5/1                  | ✗                | ✓                | ✓                              | ✓                      |
|                 | 2/0.5                | ✗                | ✗                |                                |                        |
|                 | 2/1                  | ✗                | ✗                |                                |                        |

**Table S2.** IR absorption peaks of main functional groups of azobenzenes and corresponding hydrogels

| Functional group                       | AZO A<br>(cm <sup>-1</sup> ) | AZO B<br>(cm <sup>-1</sup> ) | AZO C<br>(cm <sup>-1</sup> ) | SA_AZO A<br>Hydrogel<br>(cm <sup>-1</sup> ) | SA_AZO B Hydrogel<br>(cm <sup>-1</sup> ) | SA_AZO C<br>Hydrogel<br>(cm <sup>-1</sup> ) |
|----------------------------------------|------------------------------|------------------------------|------------------------------|---------------------------------------------|------------------------------------------|---------------------------------------------|
| <b>-CH sp<sup>2</sup></b>              | 3450-3380                    | 3450-3380                    | 3450-3380                    | 3450-3380                                   | 3450-3380                                | 3450-3380                                   |
| <b>-OH</b>                             |                              |                              |                              | 3200 (of SA)                                | 3200 (of SA)                             |                                             |
| <b>-NH<sub>2</sub></b>                 |                              |                              | 3500<br>1650<br>830          |                                             |                                          |                                             |
| <b>-NH<sub>3</sub><sup>+</sup></b>     |                              |                              |                              |                                             |                                          | 3300-3190<br>1620                           |
| <b>-CH sp<sup>3</sup></b>              | 2940-2865                    | 2940-2865                    | 2940-2865                    | 2940-2865                                   | 2940-2865                                | 2940-2865                                   |
| <b>-COO<sup>-</sup></b>                |                              |                              |                              | 1600<br>1400 (of SA)                        | 1600<br>1400 (of SA)                     | 1600<br>1400 (of SA)                        |
| <b>-C=C- aromatic</b>                  | 1598-1578                    | 1600-1400                    | 1504-1480                    |                                             |                                          |                                             |
| <b>-N=N-</b>                           | 1492                         | 1492                         | 1547                         |                                             |                                          |                                             |
| <b>-CH<sub>3</sub>-(N<sup>+</sup>)</b> | 1475                         |                              |                              |                                             |                                          |                                             |
| <b>-C-N-<br/>(C aromatic)</b>          | 1238                         | 1242                         | 1379                         |                                             |                                          |                                             |
| <b>-C-N-<br/>(C aliphatic)</b>         | 1140                         | 1147                         | 1253                         | 1246<br>(of AZO A)                          | 1250<br>(of AZO B)                       |                                             |
